# Supplementary material for: Distinctive Behaviors of Druggable Proteins in Cellular Networks
Source: PLoS Comput Biol. 2015 Dec 23;11(12):e1004597. doi: 10.1371/journal.pcbi.1004597 (PMC4689399; doi:10.1371/journal.pcbi.1004597)
Supplement: S2 Table — (XLSX) [file pcbi.1004597.s003.xlsx]

## Sheet: Top 49 non-FDA predictions
					All Target		Target (non-cancer)		Cancer Target		Cancer-Associated		Neighbours		Disease	Druggable structures		Compounds (<1μM)
PAC	Gene	In original list	In original Network	Max Percentile	Rank	Percentile	Rank	Percentile	Rank	Percentile	Rank	Percentile	FDA/total	FDA DT gene names	MIM MORBID	druggable/tested	Ligand-based Druggability Percentile Rank	active/tested	Description	Family	Class	EC Number
P18031	PTPN1			0.993106	108	0.991907	1125	0.915699	92	0.993106	91	0.993181	11/51	ABL1,EGFR,EPOR,ESR1,GHR,IGF1R,INSR,JAK2,MET,PDGFRB,SRC	-	4/128	89	699/3698	Tyrosine-protein phosphatase non-receptor type 1	protein-tyrosine phosphatase family. Non-receptor class 1 subfamily.	Phosphatase; Protein Phosphatase	3.1.3.48
P21860	ERBB3			0.993031	300	0.97752	459	0.965605	93	0.993031	348	0.973923	12/66	ABL1,EGFR,ERBB2,ERBB4,FGFR1,HCK,HDAC6,ITK,JAK2,JAK3,PTK6,SRC	607598	6/11	77	10/95	Receptor tyrosine-protein kinase erbB-3	protein kinase superfamily. Tyr protein kinase family. EGF receptor subfamily.	Protein Kinase	2.7.10.1
P46109	CRKL			0.99378	92	0.993106	271	0.979693	83	0.99378	252	0.981117	10/73	ABL1,EPHB6,EPOR,ERBB2,IFNAR1,IGF1R,INSR,KIT,LYN,PDGFRA	-	0/6	93		Crk-like protein	CRK family.	CRK
P30411	BDKRB2		n	0.995429	157	0.988235	61	0.995429	1885	0.858749	1937	0.854852	3/14	ACE,AGTR1,SRC	-	No structures	87	361/1489	B2 bradykinin receptor	G-protein coupled receptor 1 family	GPCR Class 1
P20827	EFNA1			0.995879	56	0.995804	1492	0.888198	55	0.995879	175	0.986886	9/14	EPHA1,EPHA2,EPHA3,EPHA4,EPHA5,EPHA6,EPHA7,EPHA8,EPHB1	-	0/2	59		Ephrin-A1	ephrin family.	Ephrin
Q96PN6	ADCY10		n	0.994305	289	0.978344	3819	0.713825	76	0.994305	2945	0.779318	2/2	PTGIR,SSTR5	143870	10/27	74	1/4	Adenylate cyclase type 10	adenylyl cyclase class-4/guanylyl cyclase family	Cyclase	4.6.1.1
P01225	FSHB			0.991832	334	0.974972	109	0.991832	4244	0.681978	8632	0.353166	1/3	FSHR	229070	1/4	59		Follitropin subunit beta	glycoprotein hormones subunit beta family.	glycoprotein hormones subunit beta family.
Q9Y215	COLQ			0.995504	364	0.972724	60	0.995504	6154	0.538854	9959	0.253728	2/3	ACHE,BCHE	603034	0/1	59		Acetylcholinesterase collagenic tail peptide	COLQ family.	Esterase
Q15842	KCNJ8		n	0.992207	163	0.987786	104	0.992207	4157	0.688498	8864	0.335781	3/4	ABCC8,ABCC9,KCNJ11	272120	No structures	77	25/323	ATP-sensitive inward rectifier potassium channel 8	inward rectifier-type potassium channel (TC 1.A.2.1) family	Ion Channel
P61278	SST		n	0.99483	363	0.972799	3267	0.755189	69	0.99483	2342	0.824504	5/6	SSTR1,SSTR2,SSTR3,SSTR4,SSTR5	-	0/1	59	0/1	Somatostatin	somatostatin family	Somatostatin
P48051	KCNJ6		n	0.992132	105	0.992132	157	0.988235	4131	0.690446	7865	0.410641	3/7	ADRB2,DRD2,GABBR1	-	No structures	59	21/65	G protein-activated inward rectifier potassium channel 2	inward rectifier-type potassium channel (TC 1.A.2.1) family	Ion Channel
O43921	EFNA2			0.994979	67	0.994979	2539	0.809741	80	0.994005	268	0.979918	4/7	EPHA2,EPHA3,EPHA4,EPHA5	-	0/1	59	0/1	Ephrin-A2	ephrin family.	Ephrin
O14672	ADAM10			0.996028	53	0.996028	697	0.947771	78	0.994155	309	0.976845	1/8	EPHA3	615537,615590	No structures	91	125/161	Disintegrin and metalloproteinase domain-containing protein 10, ADAM 10		Metalloproteinase	3.4.24.81
O75899	GABBR2			0.994305	243	0.981791	76	0.994305	7464	0.440689	5513	0.586886	3/8	GABBR1,GLP1R,HTR1A	-	2/12	99	16/102	Gamma-aminobutyric acid type B receptor subunit 2, GABA-B receptor 2, GABA-B-R2, GABA-BR2, GABABR2, Gb2	G-protein coupled receptor 3 family. GABA-B receptor subfamily.	GPCR Class 3
P62166	NCS1			0.993181	410	0.969277	91	0.993181	7571	0.432671	7419	0.444061	3/8	DRD2,DRD3,DRD5	-	4/8	88		Neuronal calcium sensor 1, NCS-1	recoverin family.	Recoverin
P52797	EFNA3			0.993481	271	0.979693	7332	0.450581	87	0.993481	306	0.97707	5/8	EPHA2,EPHA3,EPHA4,EPHA5,EPHA7	-	No structures	59		Ephrin-A3	ephrin family.	Ephrin
P52798	EFNA4			0.994455	74	0.994455	2053	0.84616	84	0.993706	321	0.975946	7/8	EPHA2,EPHA3,EPHA4,EPHA5,EPHA6,EPHA8	-	No structures	59		Ephrin-A4	ephrin family.	Ephrin
O95837	GNA14		n	0.994755	161	0.987936	70	0.994755	5239	0.607419	7759	0.418584	4/9	ADRB2,CHRM2,OPRL1,SSTR2	-	No structures	59		Guanine nucleotide-binding protein subunit alpha-14	G-alpha family	G-alpha
P35626	ADRBK2		n	0.993706	174	0.986961	84	0.993706	6863	0.485725	6174	0.537355	5/9	AGTR1,CCR5,CXCR4,OPRM1,SSTR2	-	No structures	63	1/21	Beta-adrenergic receptor kinase 2	AGC Ser/Thr protein kinase family	Protein Kinase	2.7.11.15
P52803	EFNA5	y		0.994904	68	0.994904	2784	0.791383	68	0.994904	222	0.983365	9/10	EPHA2,EPHA3,EPHA4,EPHA5,EPHA7,EPHA8,EPHB1,EPHB2,SRC	-	2/8	59		Ephrin-A5	ephrin family.	Ephrin
P35243	RCVRN			0.995579	197	0.985238	59	0.995579	4203	0.685051	2843	0.786961	1/11	TOP1	-	0/1	94		Recoverin	recoverin family.	Recoverin
Q9UH77	KLHL3		n	0.992432	226	0.983065	101	0.992432	3490	0.738479	3617	0.728962	1/12	OPRD1	614495	2/2	81		Kelch-like protein 3
Q9UEW8	STK39			0.991083	119	0.991083	835	0.93743	3574	0.732184	4732	0.64541	2/17	SLC12A1,SLC12A3	-	No structures	74	7/84	STE20/SPS1-related proline-alanine-rich protein kinase, Ste-20-related kinase	protein kinase superfamily. STE Ser/Thr protein kinase family. STE2 subfamily.	Protein Kinase	2.7.11.1
P81274	GPSM2			0.991158	118	0.991158	297	0.977744	3412	0.744324	4334	0.675234	0/11	-	604213	0/1	59		G-protein-signaling modulator 2	GPSM family.	GPSM family.
P30793	GCH1			0.992956	178	0.986662	94	0.992956	3184	0.761409	4758	0.643462	0/13	-	128230,233910	0/1	59		GTP cyclohydrolase 1	GTP cyclohydrolase I family.	Cyclohydrolase	3.5.4.16
Q08828	ADCY1		n	0.992357	268	0.979918	102	0.992357	3382	0.746572	9023	0.323867	0/2	-	610154	No structures	77	71/97	Adenylate cyclase type 1	adenylyl cyclase class-4/guanylyl cyclase family	Cyclase	4.6.1.1
P32302	CXCR5			0.992132	323	0.975796	105	0.992132	4145	0.689397	9093	0.318621	0/2	-	-	No structures	60	0/53	C-X-C chemokine receptor type 5, CXC-R5, CXCR-5	G-protein coupled receptor 1 family.	GPCR Class 1
Q01726	MC1R			0.992731	348	0.973923	97	0.992731	9863	0.260922	10672	0.2003	0/3	-	266300,613098,613099	No structures	98	405/859	Melanocyte-stimulating hormone receptor, MSH-R	G-protein coupled receptor 1 family.	GPCR Class 1
Q9NZC3	GDE1		n	0.990933	121	0.990933	164	0.987711	6705	0.497565	7822	0.413863	0/5	-	-	No structures	96		Glycerophosphodiester phosphodiesterase 1	glycerophosphoryl diester phosphodiesterase family	Phosphodiesterase	3.1.4.44
P33897	ABCD1			0.993406	130	0.990259	88	0.993406	4155	0.688647	8744	0.344773	0/5	-	300100	No structures	67		ATP-binding cassette sub-family D member 1	ABC transporter superfamily. ABCD family. Peroxisomal fatty acyl CoA transporter (TC 3.A.1.23) subfamily.	Transporter
P36382	GJA5			0.993631	270	0.979768	85	0.993631	5215	0.609217	6824	0.488647	0/5	-	108770,614049	No structures	59		Gap junction alpha-5 protein	connexin family. Alpha-type (group II) subfamily.	Connexin
Q14416	GRM2		n	0.991982	171	0.987186	107	0.991982	6080	0.544399	6322	0.526265	0/6	-	-	0/2	96	376/788	Metabotropic glutamate receptor 2	G-protein coupled receptor 3 family	GPCR Class 3
O95622	ADCY5		n	0.99483	89	0.993331	69	0.99483	1456	0.890895	4153	0.688797	0/7	-	606703	No structures	80	48/145	Adenylate cyclase type 5	adenylyl cyclase class-4/guanylyl cyclase family	Cyclase	4.6.1.1
Q9Y272	RASD1			0.992507	340	0.974522	100	0.992507	3856	0.711053	4509	0.662121	0/9	-	-	No structures	59		Dexamethasone-induced Ras-related protein 1	small GTPase superfamily. RasD family.	Small GTPase
Q9UNE7	STUB1			0.993406	761	0.942975	5346	0.599401	88	0.993406	134	0.989959	12/144	ABL1,AR,CLCN2,CYP3A4,EGFR,ERBB2,ESR1,GHR,HDAC6,MAOA,RAF1,SRC	615768	0/1	59		E3 ubiquitin-protein ligase CHIP		Ligase	6.3.2.-
Q09472	EP300			0.996553	126	0.990558	6049	0.546722	46	0.996553	4	0.9997	14/335	ABL1,AR,ESR1,ESR2,HDAC1,HDAC3,HDAC6,MAP2K1,NR1H4,PARP1,PLG,PPARA,PPARG,SRC	613684	2/14	91	3/167	Histone acetyltransferase p300, p300 HAT		Acetyltransferase	2.3.1.48
P16333	NCK1			0.992956	94	0.992956	250	0.981266	98	0.992656	319	0.976096	14/81	ABL1,CD3E,DRD3,DRD4,EGFR,EPHB1,EPHB2,FGFR1,FLT1,FLT3,KDR,KIT,MET,PDGFRB	-	0/6	78	0/4	Cytoplasmic protein NCK1		SH2/SH3 adaptor
Q92793	CREBBP			0.995204	215	0.983889	11675	0.125141	64	0.995204	8	0.999401	15/257	AR,ESR1,FGFR1,HCK,HDAC1,HDAC3,IKBKB,LYN,NR3C1,PARP1,PPARG,RXRG,SRC,THRA,VDR	180849	12/46	93	5/132	CREB-binding protein		Acetyltransferase	2.3.1.48
Q12913	PTPRJ			0.993181	91	0.993181	303	0.977295	107	0.991982	326	0.975571	15/40	ALK,EGFR,EPOR,ERBB2,FLT1,GHR,GRIN2B,INSR,JAK2,KDR,KIT,LCK,MET,PDGFRB,TEK	-	0/3	93	0/1	Receptor-type tyrosine-protein phosphatase eta, Protein-tyrosine phosphatase eta, R-PTP-eta	protein-tyrosine phosphatase family. Receptor class 3 subfamily.	Phosphatase; Protein Phosphatase	3.1.3.48
P04637	TP53			0.995504	1072	0.91967	2619	0.803747	60	0.995504	9	0.999326	19/437	ABL1,BTK,DHFR,EPHA3,ESR1,HDAC1,HDAC2,HDAC3,IKBKB,NR3C1,PARP1,POLA1,PTGS2,RRM2,RRM2B,SSTR3,THRB,TOP1,TOP2A	'133239,151623,202300,211980,260500,275355,614740	13/125	78	175/551	Cellular tumor antigen p53	p53 family.	p53 family.
P08575	PTPRC			0.996703	44	0.996703	558	0.958187	111	0.991682	53	0.996028	20/68	CD2,CXCR4,DPP4,EGFR,EPOR,ERBB2,FYN,GHR,GRIN2B,IFNAR1,INSR,ITGAL,JAK1,JAK2,JAK3,LCK,LYN,MET,PDGFRB,TEK	-	2/2	75	64/1217	Receptor-type tyrosine-protein phosphatase C	protein-tyrosine phosphatase family. Receptor class 1/6 subfamily.	Phosphatase; Protein Phosphatase	3.1.3.48
P42229	STAT5A			0.991757	110	0.991757	243	0.981791	207	0.984489	224	0.983215	22/73	BTK,CCR5,CTLA4,EGFR,EPOR,ERBB4,ESR1,ESR2,GHR,IL2RB,INSR,JAK1,JAK2,JAK3,KIT,LCK,NR3C1,PDGFRA,PDGFRB,PPIB,SRC,TEK	-	No structures	65	4/26	Signal transducer and activator of transcription 5A	transcription factor STAT family.	STAT
P29350	PTPN6			0.993406	88	0.993406	393	0.970551	161	0.987936	109	0.991832	23/103	EGFR,ABL1,SSTR2,KIT,LYN,INSR,JAK3,JAK2,EPOR,GHR,CXCR4,IL2RB,JAK1,ESR1,PDGFRB,KDR,TNFRSF1A,FLT3,LCK,CSF2RB,IFNAR1,CD33,SRC	-	4/12	81	20/301	Tyrosine-protein phosphatase non-receptor type 6	protein-tyrosine phosphatase family. Non-receptor class 2 subfamily.	Phosphatase; Protein Phosphatase	3.1.3.48
P19174	PLCG1	y		0.993256	100	0.992507	600	0.955039	90	0.993256	17	0.998726	28/123	ABL1,AGTR1,ALK,AR,BTK,EGFR,EPHB2,EPOR,ERBB2,FGFR1,FGFR2,FLT1,FYN,GHR,GRIN2A,GRIN2B,HCK,INSR,ITK,KDR,KIT,LCK,LYN,MET,PDGFRA,PDGFRB,RET,SRC	-	2/9	94	0/11	1-phosphatidylinositol 4,5-bisphosphate phosphodiesterase gamma-1		Phosphatase; Protein Phosphatase	3.1.4.11
P05067	APP			0.994605	13345	0	72	0.994605	13345	0	13345	0	28/2008	ABL1,ACHE,ALDH2,ALOX5,BTK,EPHA2,EPHB4,FGFR2,FKBP1A,FYN,GUCY1B3,HCK,HK1,IDE,IGF1R,IL1B,LPL,PARP3,PPARG,PPIA,PTK6,SLC22A6,SNAP25,SSTR2,TEK,TOP1,TUBB,UGCG	104300,605714	3/104	87	193/408	Amyloid beta A4 protein	APP family.	APP
P22681	CBL			0.996253	282	0.978868	2580	0.806669	50	0.996253	13	0.999026	29/132	ABL1,BLK,BTK,CSF1R,EGFR,EPHA2,EPHB1,EPHB6,EPOR,ERBB2,FGR,FLT1,FLT3,FYN,HCK,IGF1R,INSR,ITK,KDR,KIT,LCK,LYN,MET,PDGFRA,PDGFRB,RET,SCN5A,SRC,YES1	613563	15/21	74		E3 ubiquitin-protein ligase CBL		Ligase	6.3.2.-
P27986	PIK3R1	y		0.996403	76	0.994305	902	0.932409	48	0.996403	6	0.99955	37/153	ABL1,ALK,AR,CD3E,CSF1R,CSF2RA,CTLA4,EGFR,EPHA2,EPOR,ERBB2,ESR1,FGFR1,FYN,GHR,HCK,HDAC1,IFNAR1,IGF1R,IL1R1,IL2RB,INSR,JAK1,JAK2,JAK3,KIT,LCK,MET,MME,PDGFRA,PDGFRB,RET,SRC,SSTR2,TEK,TSHR,TUBA1B	269880,615214,616005	5/28	84	105/191	Phosphatidylinositol 3-kinase regulatory subunit alpha, PI3-kinase regulatory subunit alpha, PI3K regulatory subunit alpha, PtdIns-3-kinase regulatory subunit alpha	PI3K p85 subunit family.	PI3K p85 subunit family.
P40763	STAT3			0.993855	106	0.992057	3351	0.748895	82	0.993855	20	0.998501	39/172	ADRB2,ALK,AR,BLK,CCR5,CSF2RB,CSF3R,CXCR4,EGFR,EPHA3,ERBB2,FGFR3,FGR,FLT1,FYN,GHR,HCK,HDAC1,HDAC2,HDAC3,IFNAR1,IFNAR2,IGF1R,IL2RA,IL2RB,IL6R,JAK1,JAK2,JAK3,LCK,LYN,MET,MTOR,NR3C1,PDGFRA,PDGFRB,RET,SRC,TSHR	147060,615952	1/1	97	91/617	Signal transducer and activator of transcription 3	transcription factor STAT family.	STAT
P62993	GRB2	y		0.99423	338	0.974672	1291	0.90326	77	0.99423	96	0.992806	43/361	ABL1,ADA,ADRB1,ADRB2,ALK,ALOX5,AR,BTK,CHRM4,CSF1R,CSF3R,DRD3,DRD4,EGFR,EPHA2,EPHB1,EPHB2,EPHB6,EPOR,ERBB2,ERBB4,ESR1,FGFR1,FGFR2,FGFR3,FLT1,FLT3,FLT4,FYN,GHR,IL2RB,ITGA2B,ITK,JAK1,JAK2,KDR,KIT,MET,PDGFRB,RET,SRC,TEK,TNFRSF1A	-	1/46	81	144/407	Growth factor receptor-bound protein 2	GRB2/sem-5/DRK family.	GRB2/sem-5/DRK family.
															MORBID KEY	SBD KEY	LBD KEY
															non-cancer	Unknown	yellow: 100%
															cancer	druggable	white: 50%
															both	Not druggable
